# Supplementary material for: Growing COFsin situon CdS nanorods as core–shell heterojunctions to improve the charge separation efficiency
Source: Royal Society of Chemistry journal article supplement (doi:10.1039/d2se01159j), 2022-01-01
Supplement: d2se01159j1.pdf [file d2se01159j1.pdf]

## Supporting Information

# COF in situ growing on CdS nanorods as core-shell heterojunction for improving the charge-separation efficiency

Yanan Feng,<sup>a, b, c</sup> Jingjun Li,<sup>b, c</sup> Shihua Ye,<sup>b, c</sup> Shuiying Gao,<sup>b, c,\*</sup> Rong Cao<sup>a, b, c d,\*</sup>

<sup>a</sup> *College of Chemistry, Fuzhou University, Fuzhou 350002, China*

<sup>b</sup> *State Key Laboratory of Structural Chemistry, Fujian Institute of Research on the Structure of Matter, Chinese Academy of Sciences, Fuzhou 350002, China*

<sup>c</sup> *University of the Chinese Academy of Sciences, Beijing 100049, China*

<sup>d</sup> *Fujian Science & Technology Innovation Laboratory for Optoelectronic Information of China, Fuzhou 350108, China*

**\* Corresponding authors.**

**E-mail addresses:**

**gaosy@fjirsm.ac.cn (S. Gao),**

**rcao@fjirsm.ac.cn (R. Cao).**

**Part S1**

**Characterization**

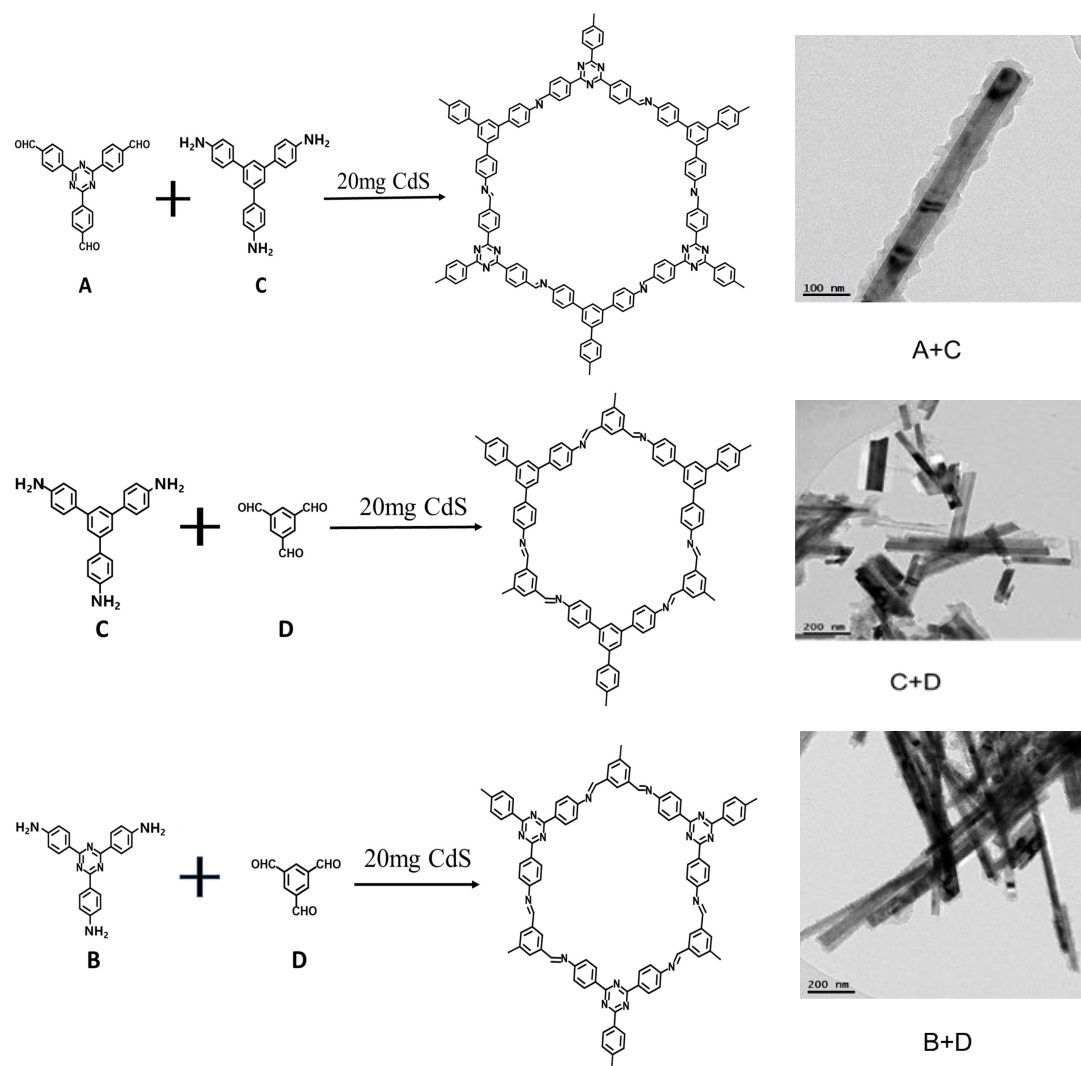

**Fig. S1** Synthetic process and TEM images of CdS@COF<sub>A+C</sub>, CdS@COF<sub>C+D</sub> and CdS@COF<sub>B+D</sub>, respectively.

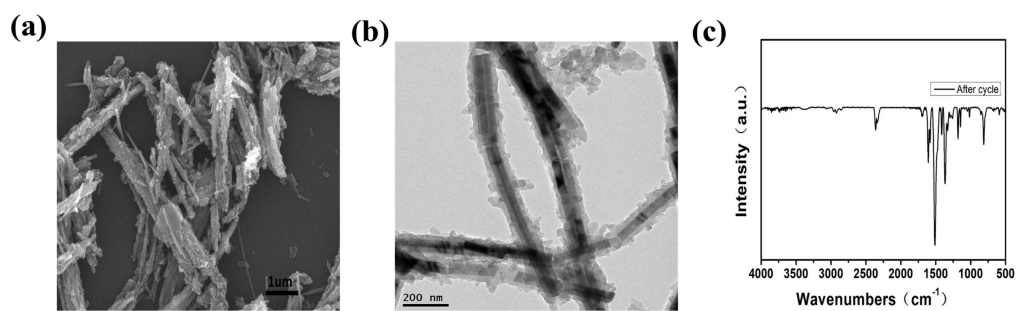

**Fig. S2** SEM, TEM and FT-IR after hydrogen evolution cycling reaction of CdS@TTI-COF-60

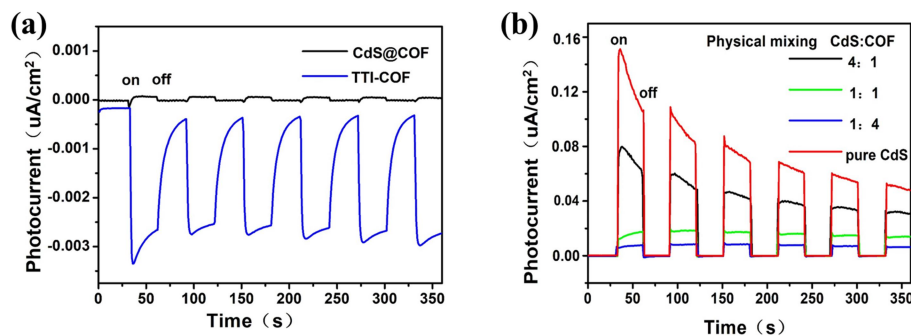

**Fig. S3** Photocurrent response of (a)TTI-COF and CdS@TTI-COF-60 (b)pure CdS and physical mixing of CdS and TTI-COF

## Part S2

### Calculation of apparent quantum yield

The apparent quantum yield (AQY) of CdS@TTI-COF-60 was calculated based on the H<sub>2</sub> production under simulated solar irradiation by a Xe lamp equipped with a 420nm monochromatic optical filter, the ILT 950 spectroradiometer was used to measure the intensity of incident monochromatic illumination . The AQY is calculated by using the following equation

$$AQY = \frac{2MN_Ahc}{AIt\lambda} \times 100\%$$

Where M is molar amounts of H<sub>2</sub> during irradiation 1 h ( $M=4.25 \times 10^{-6}$  mol/h), N<sub>A</sub> is Avogadro constant ( $6.022 \times 10^{23}$  mol<sup>-1</sup>). h is Planck constant ( $6.626 \times 10^{-34}$  J·s). c is the light velocity ( $3 \times 10^8$  m/s). A is the irradiation area ( $1.6 \times 10^{-3}$  m<sup>2</sup>). I is the intensity of irradiation light ( $281.46$  W/m<sup>2</sup>). t is the reaction time (3600 s).  $\lambda$  is the wavelength of the monochromatic light ( $\lambda= 420$  nm). Finally, AQY=0.15%

## Part S3

### Carrier density calculation

The carrier density (N<sub>D</sub>) is calculated using this formula: <sup>1-3</sup>

$$N_D = (2/e\epsilon\epsilon_0)[d(U_{FL})/d(1/C^2)]$$

where  $e = 1.6 \times 10^{-19}$  C,  $\epsilon_0 = 8.86 \times 10^{-12}$  F m<sup>-1</sup>,  $\epsilon$  is the dielectric constant, and C is the

capacitance. The dielectric constants of TTI-COF and CdS are about 3.67 and 6.56, respectively. The slopes of TTI-COF and CdS are  $6.4 \times 10^{10}$  and  $3 \times 10^{10}$ . Therefore, the  $N_D$  values of TTI-COF and CdS are about  $5.99 \times 10^{18} \text{ cm}^{-3}$  and  $7.16 \times 10^{18} \text{ cm}^{-3}$ , respectively.

## References

- 1 X. Fang-Xing, S.F. Hung, J.W. Miao, H.Y. Wang, H.B. Yang, B. Liu, *Small*, 2015, **11**, 554-567.
- 2 Z.H. Zhang, P. Wang, *Energy Environ. Sci.*, 2012, **5**, 9948-9948.
- 3 G. Wang, Q. Wang, W. Lu, J.H. Li, *J. Phys. Chem. B*, 2006, **110**, 22029-22034.
